1 **The algae community in taxon Haptophyceae at the early bloom stage of**  
2 ***Phaeocystis globosa* in Northern Beibu Gulf in winter**

3

4 Bin Gong<sup>1,2\*</sup>, Haiping Wu<sup>\*2</sup>, Jixian Ma<sup>4</sup>, Meimiao Luo<sup>2</sup>, Xin Li<sup>2</sup>

5

6 1. Institute of Marine Drugs, Guangxi university of chinese medicine, Nanning, Guangxi, China,  
7 530200

8 2. Guangxi Key Laboratory of Beibu Gulf Marine Biodiversity Conservation, Qinzhou University,  
9 Qinzhou, China, 535000

10 3. Guangxi Key Laboratory of Marine Disaster in the Beibu Gulf, Qinzhou University, Qinzhou,  
11 China, 535000

12 4. Marine Environment Monitoring Center, Qinzhou Oceanic administration, Qinzhou, China,  
13 535000

14

15 \*Correspondent author

16 Haiping Wu: wuhaipingsky@163.com

17 Bin Gong: 342965691@aliyun.com

18

19 **Abstract:**

20 *Phaeocystis globosa* (Order Phaeocystales, family Phaeocystaceae) caused significant impact on  
21 aquaculture farming, global climate change and industry. Since the year 2010, intensive red tides  
22 of *P. globosa* began to appear in Beibu Gulf, where previously free of harmful algal blooms, and  
23 posed great threats to the cooling systems of a nuclear power plant in 2014 and 2015. In order to  
24 discover the bloom mechanism, the community structure of marine microalgae, with a focus on  
25 Haptophyceae taxa, in winter in the northern Beibu Gulf near the Qinzhou Bay, Sanniang Bay  
26 (SNB) and Dafenjiang River Estuary (DRE), were explored via 18S ribosomal DNA analysis of the  
27 V4 region using the Illumina-Based Sequencing platform. The correlation between the relative  
28 abundance of five kinds of Haptophyceae algae and environmental factors of seawater were

29 analyzed. The most abundant Haptophyceae-related OTU in terms of number of reads was  
30 identified as *Phaeocystis* and *Chrysochromulina*. The abundance for other Haptophyceae class  
31 was relatively low, such as *Haptolina*, *Prymnesium* and *Isochrysis*. *Phaeocystis* was present in all  
32 samples sites except S6, S11, S12, S14 and S15, and particularly abundant at S8, nearly 29 times  
33 more than the second most abundant site. Most notably, the results showed that *Phaeocystis*  
34 displayed highly positive linear correlation with the concentration of  $\text{NO}_3^-$ -N (Pearson  $r=0.856$ ,  
35  $p<0.01$ ). Linear regression analysis indicated that *Phaeocystis* was significantly linearly related to  
36 the  $\text{NO}_3^-$ -N ( $R^2=0.732$ ;  $Y=-0.005 + 0.410 \cdot X$ ,  $Y$  is the relative abundance of *P.globosa*,  $X$  is the  
37 concentration of  $\text{NO}_3^-$ -N;  $F=38.227$ ,  $P<0.05$ ) and  $\text{NO}_3^-$ -N has a significant positive effect on  
38 *P.globosa* (regression coefficient is 0.410,  $P=0.000$ ). Moreover, the relative abundance of  
39 *Phaeocystis* was significant related to temperature of sea water (Pearson  $r=-0.882$ ,  $p<0.01$ ).  
40 Water temperature can explain the 77.8% change reason for the *P.globosa* ( $R^2=0.778$ ), and has a  
41 significant effect on *P. globosa* ( $Y=0.169-0.009 \cdot X$ ,  $F=49.031$ ,  $P<0.05$ ), and the regression  
42 coefficient is -0.009 ( $P=0.000$ ) which indicated a significant negative impact relationship between  
43 them. Our high throughput sequencing (HTS) based research illustrated how the *P. globosa*  
44 bloom generated and its relationship with  $\text{NO}_3^-$ -N and temperature of sea water in northern  
45 Beibu Gulf for the first time, and bringing hope for solving this big problem.

46

#### 47 **Key Words:**

48 *Phaeocystis globosa*, high throughput sequencing, nitrate, temperature, Haptophyceae, Beibu  
49 Gulf

50

#### 51 **Introduction:**

52 Haptophyceae (or Prymnesiophyceae), a class of the phylum Chrysophyta, contained the Order  
53 Prymnesiales, Discoasterales, Phaeocystales, Isochrysidales. The bloom of some Haptophyceae  
54 algae had occurred frequently worldwide and led to great ecological disaster and substantial  
55 economic losses. For instance, *Prymnesium parvum*, a species of Haptophyceae algae (Order

56 Prymnesiales, family Prymnesiaceae), is capable of producing a toxin, prymnesin, and kills fish  
57 [1]. Similarly, large area bloom of the *Chrysochromulina polylepis* (Order Prymnesiales, family  
58 Prymnesiaceae) have resulted in mortality of trout and salmon in Scandinavian waters during  
59 Spring 1988 [2]. Further more, the bloom of *Phaeocystis globosa* (Order Phaeocystales, family  
60 Phaeocystaceae) caused mortality of cultured fish [3], Mussel Mortalities [4], higher  
61 concentration of DMS [5] and Clogging of Cooling System of Power Plant [6], so both significantly  
62 impact aquaculture farming, global climate change and industry.

63 Beibu Gulf is an important habitat for protection and propagation of marine organisms,  
64 known for Indo-Pacific humpback dolphins [7], horseshoe crabs [8], and also an ecologically  
65 sensitive region [9]. Recently, rapid economic development and human activities had already  
66 resulted in great degradation of marine environment [10,11]. Most noticeably, human-induced  
67 nutrient enrichment is becoming a serious problem for coastal marine areas of Beibu Gulf [9,12].  
68 Since the year 2010, intensive red tides of *P. globosa* began to appear in Beibu Gulf, where  
69 previously free of harmful algal blooms, and posed great threats to the cooling systems of a  
70 nuclear power plant in 2014 and 2015 [6]. Up to now, knowledge on where the *P. globosa*  
71 originated and the bloom mechanism is still quite limited. In our opinion, in order to solve the  
72 great confusion above, special attention should be paid to the early bloom stage and the  
73 environmental characteristics leading to the bloom. For this purpose, many methods had been  
74 utilized, such as automatic monitoring buoy [13], satellite remote sensing [14], “molecular  
75 probes” [15], methods to detect and quantify toxins [16] and a combination of methods above  
76 [17].

77 Environmental DNA-based Techniques (EDT) was utilized in monitoring Prokaryote and  
78 Eukaryotes in water environments for many years and significantly gained impetus over  
79 traditional approaches presently [18]. Recently, there are many EDT methods advented for this  
80 object; for instance, DNA metabarcoding [19,20], Microsatellite DNA marker [21], and high  
81 throughput sequencing (HTS) techniques based metagenomics [22,23] and amplicons [24,25]. In  
82 recent years, the HTS techniques has been widely used and remarkably promoted the ecological  
83 studies of bacteria [26], fungi [27], algae [28] and animals [29]. However, to date, molecular  
84 diversity of microeukaryotes, including algae, in the Beibu Gulf marine region, remains

85 unexplored. Thus, the recent study about the community and diversity structure of marine  
86 microalgae, with a focus on Haptophyceae taxa in winter in the northern Beibu Gulf near the  
87 Qinzhou Bay, Sanniang Bay (SNB) and Dafenjiang River Estuary (DRE), were explored via 18S  
88 ribosomal DNA analysis of the V4 region using the Illumina-Based Sequencing platform. This  
89 study provides a valid taxonomic reference dataset for future microeukaryotic community  
90 structure and diversity studies, aimed at monitoring environmental change in the northern Beibu  
91 Gulf.

92

## 93 **Materials and Methods**

### 94 **Sample Collection**

95 The samples were collected on 27 Dec 2017, when large *Phaeocystis* bloom was observed  
96 between eastern Qinzhou Bay (EQB) and Dafenjiang River Estuary (DRE), during the middle  
97 several days of Jan to the end of Mar in 2018. Seawater was collected from surface, middle and  
98 deep using a CTD Rosette Water Sampling System (Sea-Bird Electronics, USA) between eastern  
99 Qinzhou Bay (EQB) and Dafenjiang River Estuary (DRE) (21°32'58''N, 108°39'56''E-21°37'39''N,  
100 108°55'57''E) and mixed evenly. A total of 16 seawater samples (S1-S16, Figure 1) were collected  
101 in 3L sterile polyethylene bottles, kept in the dark at 4-8 °C, and filtered at laboratory within 4h.  
102 Each 3000 ml seawater sample was filtered through a 1.2 µm mixed cellulose membrane filter  
103 (Advantec, Japan) and filtrates were frozen immediately at -20°C for subsequent molecular  
104 analyses.

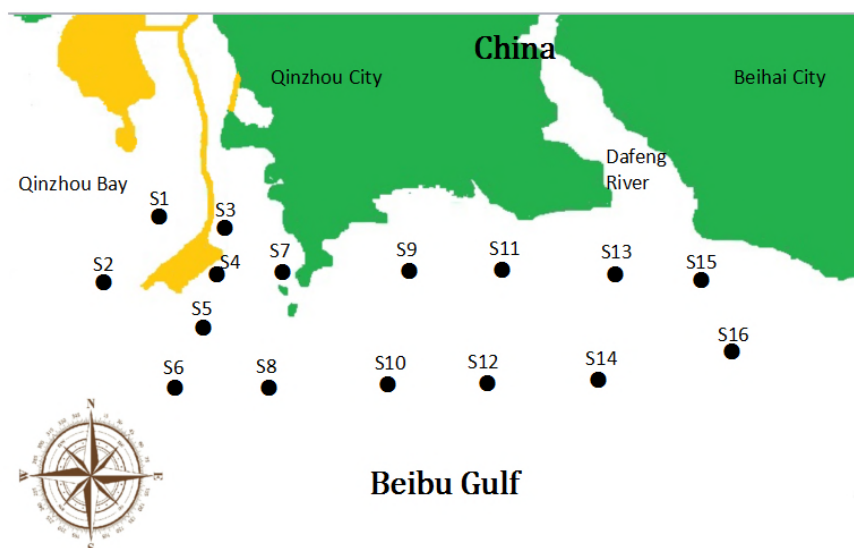

105

106 Figure 1. Locations of the the 16 sites (S1-S16) where seawater samples were collected on 27 Dec  
107 2017, including six sites near Sandun Dock (S1-S6), six sites near Sanniang Bay (SNB, S7-S12) and  
108 four sites in the Dafengjiang River Estuary (DRE,S13-S16).

#### 109 **DNA Extraction, PCR and illumina sequencing**

110 The PowerWater DNA isolation kit (MoBio Laboratories Inc., CA, USA) was used to extract the  
111 DNA of the total organisms on the 1.2  $\mu\text{m}$  filters following the manufacturer's protocol. The DNA  
112 samples were detected by 1% agarose gels and NanoDrop One spectrophotometer (Thermo  
113 Fischer Scientific Inc., USA), and then were amplified using the primers 528F and 706R [30,31]  
114 which was designed to amplify the hypervariable region V4 of eukaryote 18S rRNA gene. Illumina  
115 sequencing was carried out by the Novogene Company (Beijing, China). Sequencing libraries  
116 were generated using TruSeq<sup>®</sup> DNA PCR-Free Sample Preparation Kit (Illumina, USA) following  
117 manufacturer's recommendations and index codes were added. The library quality was assessed  
118 on the Qubit@ 2.0 Fluorometer (Thermo Scientific) and Agilent Bioanalyzer 2100 system. At last,  
119 the library was sequenced on an Illumina HiSeq2500 platform and 250 bp paired-end reads were  
120 generated. The raw data sequences were assigned to samples by their unique barcodes. The 18S  
121 rDNA primers and barcodes were cut off to generate pair-end (PE) reads. Paired-end reads were  
122 merged using FLASH (V1.2.7) [32]; the raw tags were filtered to obtain the high-quality clean tags  
123 using QIIME software package (V1.7.0) [33]. Sequences analysis were performed by Uparse  
124 software (Uparse v7.0.1001) [34]. Sequences with  $\geq 97\%$  similarity were assigned to the same

125 OTUs. For each representative sequence, the GreenGene Database [35] was used to annotate  
126 taxonomic information.

### 127 **Physical and chemical analyses of seawater characteristics**

128 The seawater temperature ( $^{\circ}\text{C}$ ), salinity were measured using the SBE 911 plus CTD (Sea-Bird  
129 Electronics, USA). Dissolved oxygen (DO) concentrations (ml/l) were measured using the SeaBird  
130 43 (Sea-Bird Electronics, USA). The pH values were measured by pH meter (METTLER, FE38-  
131 Meter, 30254110). Chlorophyll-a fluorescence was measured using the WETStar (WET Labs,  
132 USA). Inorganic nutrient concentrations (nitrate [ $\text{NO}_3^-$ -N], ammonia [ $\text{NH}_4^+$ -N], nitrite [ $\text{NO}_2^-$ ], and  
133 phosphate [ $\text{PO}_4^{3-}$ ]) were determined from 100 mL samples with an Alliance Integral Futura  
134 Autoanalyzer II [36,37]. The TOC content was determined with TOC analyzer (Multi N/C 3100,  
135 Analytik Jena AG, Jena, Germany) according to the procedure explained by Ali [38]. Spatial  
136 distribution of seawater characteristics was interpolated by the measurements of the 16  
137 sampling sites using Kriging method [39]. Interpolations outside the sampling area and over the  
138 terrestrial landscape were subtracted.

### 139 **Statistical analysis**

140 Data were compiled and transformed in Microsoft Excel. Correlation between variables were  
141 made using a linear Pearson's r coefficient. Linear regression analysis was facilitated and  
142 conducted between closely related. Statistics were generated using the SigmaStat version 2.01  
143 software package (SPSS, Inc., Chicago, Ill). All comparisons were performed at the 95%  
144 confidence level.

145

146

## 147 **Result**

### 148 **OTUs profile based on 18s RNA amplicon analysis using high throughput sequencing (HTS)**

149 The eukaryote communities in the seawater were represented by 1,594 OTUs identified in our

150 present study. A good coverage of the eukaryotic diversity in all samples were illustrated by  
151 rarefaction curves, which were calculated and reached a plateau in all cases. All OTUs were  
152 classified into 44 main Phylum, and the most abundant were Arthropoda, Ascomycota,  
153 Chlorophyta, Diatomea, Basidiomycota, Protalveolata and Picozoa (Fig 2). Among all the OTUs,  
154 our most concerned OTU was that identified as class Haptophyceae, which some Harmful algae  
155 (such as *P.globosa* and *Prymnesium*) causing serious ecological disasters represented in this  
156 group. In our study, 19 OTUs were classified into Haptophyceae, belonging to the groups of  
157 *Prymnesium*, *Haptolina*, *Isochrysis*, *Chrysochromulina* and *Phaeocystis* respectively (Fig 3).  
158 *Phaeocystis* was represented by OTU 174 and OTU 1030, with OTU 174 identified as *P. globosa*  
159 (100% similarity). *Prymnesium* was represented only by one OTU (OTU 1269), which closely  
160 related to *Prymnesium zebrinum* (98% similarity) and *Prymnesium pienaarrii* (97% similarity). The  
161 most biggest taxonomic group in Haptophyceae was identified as genus *Chrysochromulina* which  
162 including 4 OTUs. The other taxonomic groups belonging to Haptophyceae were *Haptolina*  
163 *fragaria* (100% similarity, OTU370), *Isochrysis galbana* (100% similarity, OTU1449),  
164 *Haptophyceae* sp. (96% similarity, OTU1155) (Fig 3).

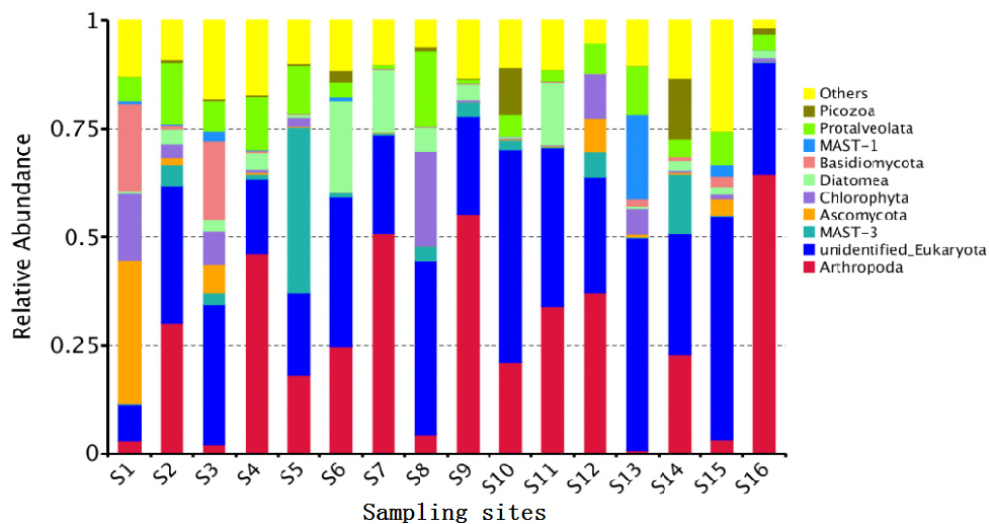

166 Figure 2. The top ten OTUs were identified based on the hypervariable region V4 of eukaryote  
167 18S rRNA gene and sequences with  $\geq 97\%$  similarity were assigned to the same OTUs.

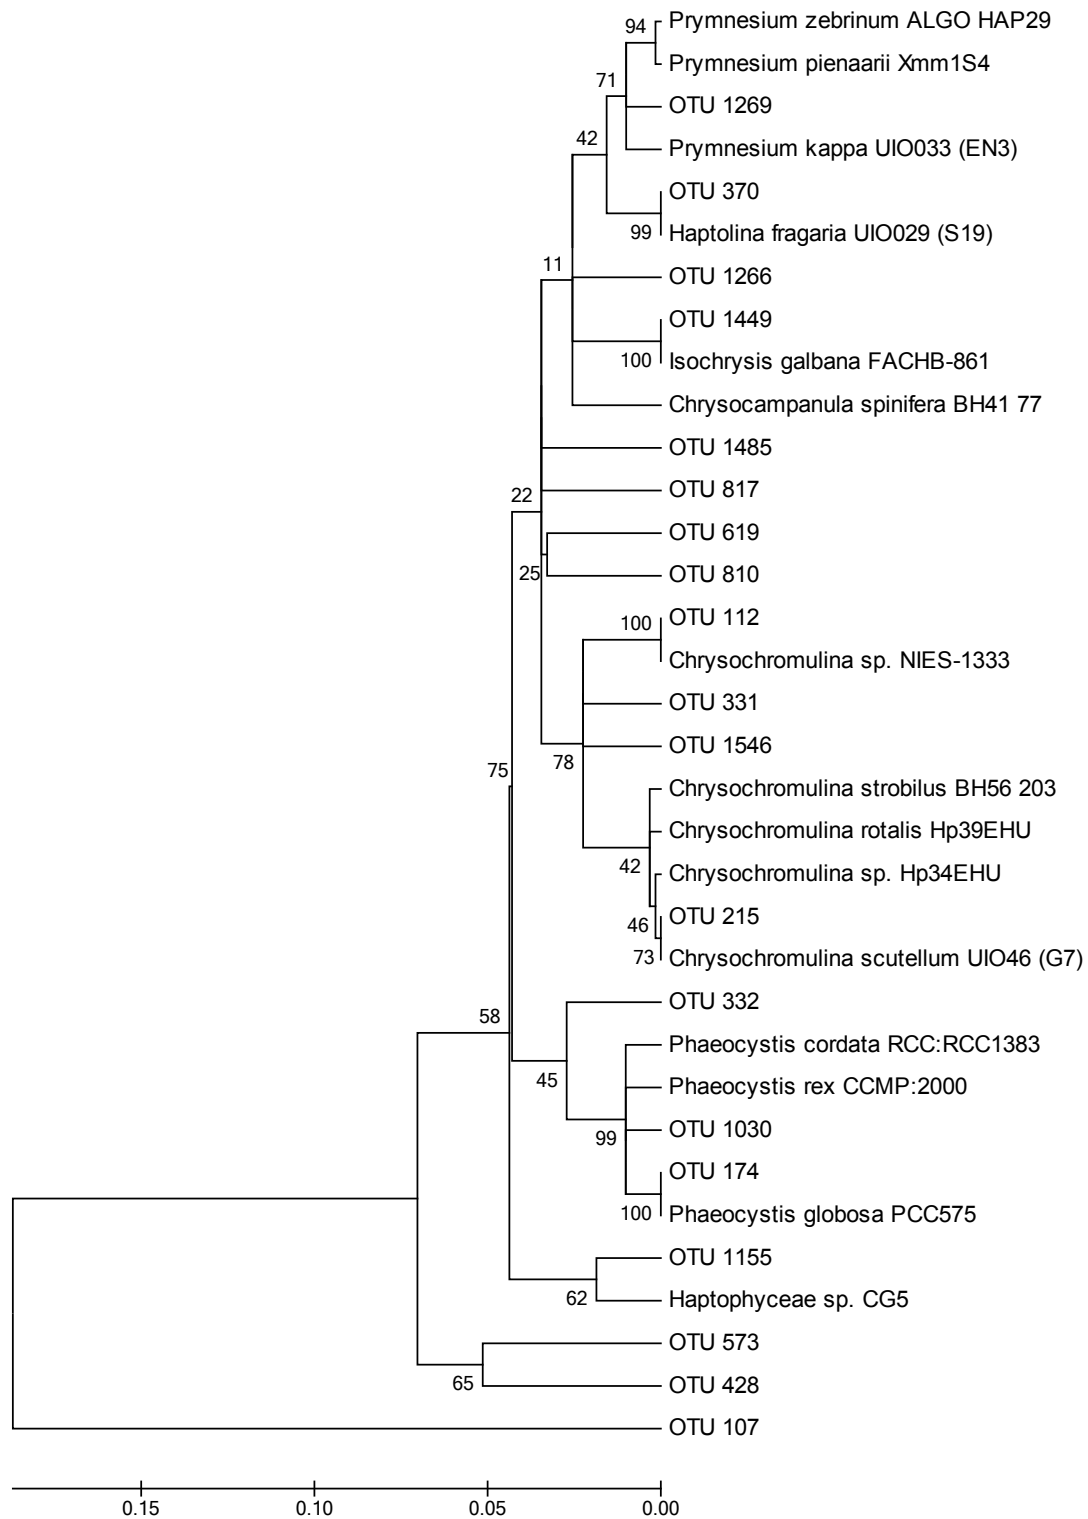

168

169 Figure 3. The taxonomic relationship of 18S rDNA phylotypes of class Haptophyceae from the the  
170 northern coast of Beibu Gulf. Kimura two-parameter model and midpoint rooting options were  
171 used to reconstruct phylogenetic relationships. Numbers above branches indicate bootstraps for  
172 NJ analysis (> 50).



173

174 The most abundant Haptophyceae-related OTU in terms of number of reads was identified  
175 as *Phaeocystis* and *Chrysochromulina*. *Chrysochromulina* was the most abundant taxa containing  
176 5353 reads, while *Phaeocystis* displayed a relatively lower number of 2298 reads. The abundance  
177 for other Haptophyceae class was relatively low, such as *Haptolina* (228 reads), *Prymnesium* (9  
178 reads), *Isochrysis* (6 reads) (Fig 4). The relative abundance of the five kinds of Haptophyceae at  
179 different sampling sites showed different characteristics. The spatial distribution of *Phaeocystis*  
180 and *Prymnesium* were similar. *Phaeocystis* was present in all samples sites except S6, S11, S12,  
181 S14 and S15, and particularly abundant at S8 (2150 reads, 3.4%), nearly 29 times more than the  
182 second most abundant site S2 (73 reads). *Prymnesium* showed the same pattern, recording the  
183 highest percentage at site S8 (7 reads, 0.01%) and haven't appeared on the other sites. While  
184 *Isochrysis* indicated very different property, with major peaks occurred at the sites S3 (5 reads)  
185 and none at the other sites. Most of algal species *Chrysochromulina* were abundant and fairly  
186 distributed at different stations with reads ranged from 158 to 899, except highest percentage  
187 (2.05 %, Site 8) and relatively lower at S6 (0%), S7 (19 reads, 0.03%), S9 (46 reads, 0.07%), S11 (30  
188 reads, 0.04%), S12 (0%) and S16 (54 reads, 0.08%). The relative abundance of *Haptolina* among  
189 different sites displayed similar pattern with *Chrysochromulina*, and the major peaks occurred at  
190 sites S8 (Fig 5).

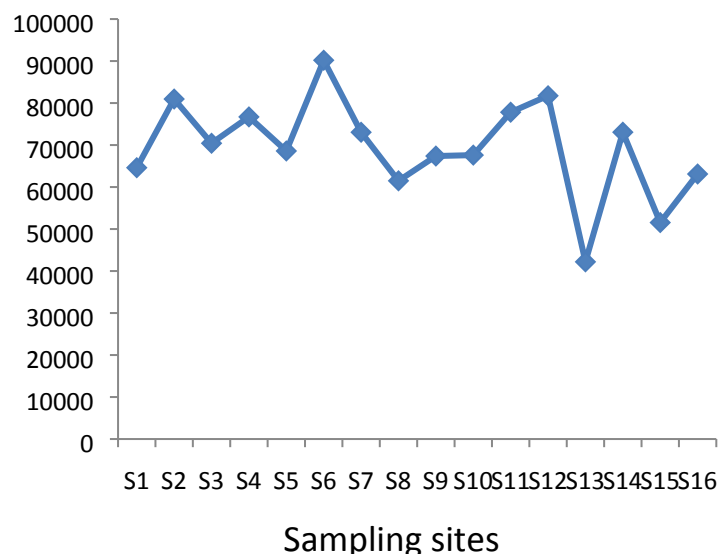

191

— ◊ — ◊ — ◊ — ◊ — ◊

192 Figure 4. The number of reads detected in 16 sampling sites using 18s RNA amplicon analysis.

193

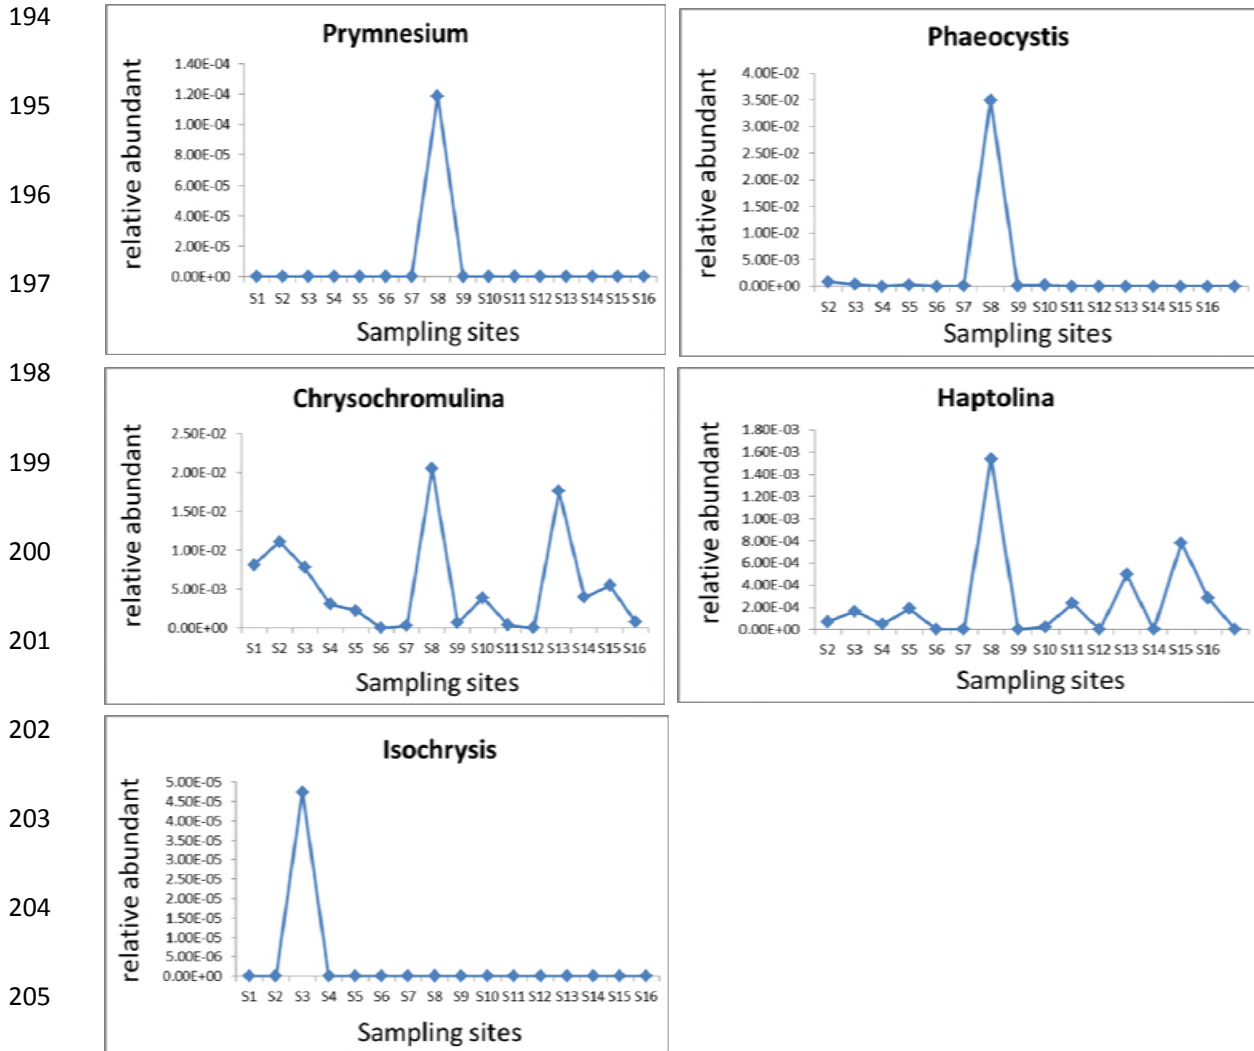

206

207

208

209

210

211 Figure 5. Spacial variations of relative abundance (%) of five Haptophyceae algae

212 (Prymnesium, Haptolina, Isochrysis, Chrysochromulina and Phaeocystis) at the different

213 stations in the northern coast of Beibu Gulf in Dec 2017.

214

## 215 **Physical and chemical analyses of seawater characteristics**

216 Physical and chemical characteristics of the seawater in the 16 sampling sites, including nutrient  
217 concentrations (TOC,  $\text{NH}_4^+\text{-N}$ ,  $\text{NO}_3^-\text{-N}$ ,  $\text{NO}_2^-\text{-N}$ , and phosphate [ $\text{PO}_4^{3-}$ ]) and other environmental  
218 condition (chlorophyll-a, DO, salinity, pH, temperature of seawater), were detected. Just as our  
219 above discovery that relative abundance of some Haptophyceae algae were obviously higher at  
220 site S8 than others, some environmental factors at S8 were apparently special as well. Seawater  
221 temperature during the period of the study ranged from 15.4 to 18.5 °C and the lowest  
222 temperature appeared at site S8, while the salinity ranged from 25.7 to 37.3 ppt and S8  
223 contained the lowest value 25.69 ppt. The highest value recorded for DO was 9.32 mg/L at site  
224 S8 and lowest was 8.33 mg/L at site S13. The highest value of pH was 8.71 at site 12 and lowest  
225 was 8.22 at S8. For the nutrient concentrations, the site S8 possessed the highest concentration  
226 of  $\text{NO}_3^-\text{-N}$  (0.066 mg/L). Spatial distribution of seawater characteristics over the study region,  
227 including DO,  $\text{NO}_3^-\text{-N}$ , temperature of seawater and pH, were simply illustrated on the map by  
228 using blue and red colour (Figure 6).

229

230

231

232

233

234

235

236

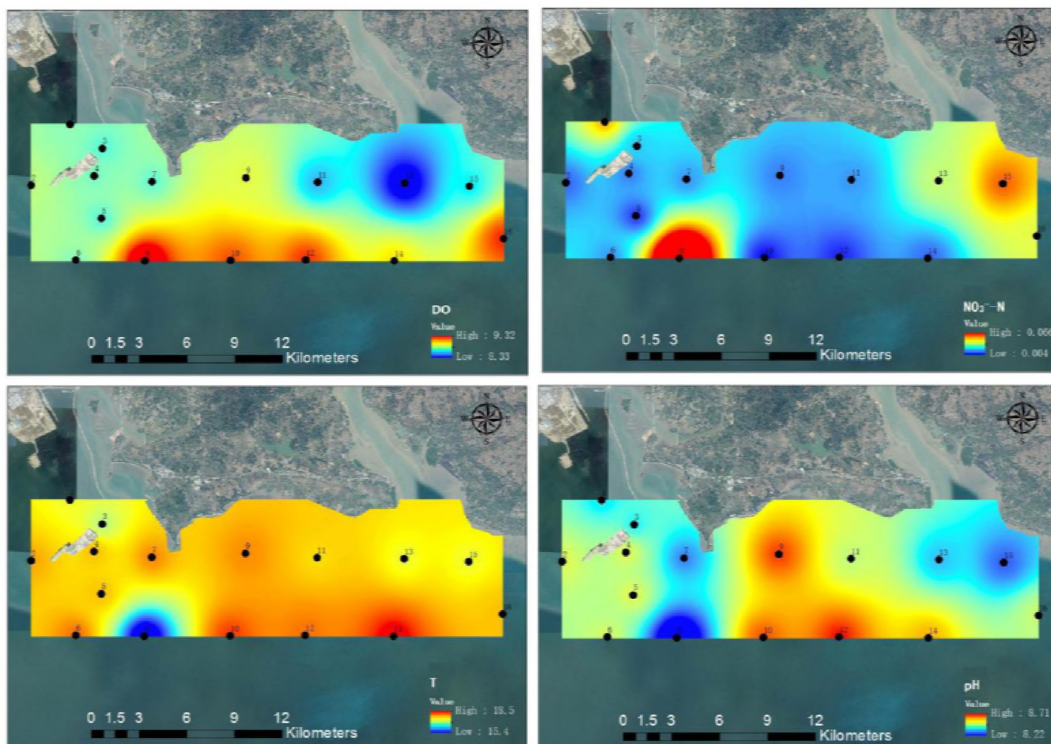

237

238

239

240

241

242 Figure 6. Spatial distribution of seawater characteristics over the study region, including DO (a),  
243  $\text{NO}_3^-$ -N (b), T-temperature of seawater (c) and pH (d).

244

#### 245 **The Correlation between environmental factor and Haptophyceae algae**

246 The correlation between the relative abundance of five kinds of Haptophyceae algae and  
247 environmental factors of seawater (temperature, pH, salinity, DO,  $\text{NO}_3^-$ -N,  $\text{NO}_2^-$ -N,  $\text{NH}_4^+$ -N,  
248 Chlorophyll a and TOC) were analyzed. The results showed that Pymnesium, Phaeocystis and  
249 Haptolina displayed highly positive linear correlation with the concentration of  $\text{NO}_3^-$ -N (Pearson  
250  $r=0.85\sim 0.92$ ,  $p<0.01$ ). Isochrysis and Chrysochromulina indicated high negative correlation with  
251 temperature of sea water (Pearson  $r=-0.88\sim -0.89$ ,  $p<0.01$ ). Except for this, there was a significant  
252 negative correlation just for Pymnesium, Haptolina, Chrysochromulina and Phaeocystis with pH  
253 and salinity (Pearson  $r=-0.52\sim -0.78$ ,  $p<0.01$ ). Chrysochromulina revealed significant negative  
254 correlation with seawater temperature (Pearson  $r=-0.787$ ,  $p<0.01$ ). Haptolina and  
255 Chrysochromulina also exhibited significant negative correlation with Chlorophyll-a (Pearson  
256  $r=-0.52\sim -0.53$ ,  $p<0.01$ ). There was a significant positive correlation of Pymnesium and  
257 Phaeocystis with DO (Pearson  $r=0.534$ ,  $p<0.01$ ), and also the same relationship of  
258 Chrysochromulina with  $\text{NO}_3^-$ -N (Pearson  $r=0.69$ ,  $p<0.01$ ). There was no other obvious correlation  
259 between other environmental factors and those five kinds of Haptophyceae algae (Fig 7).

260

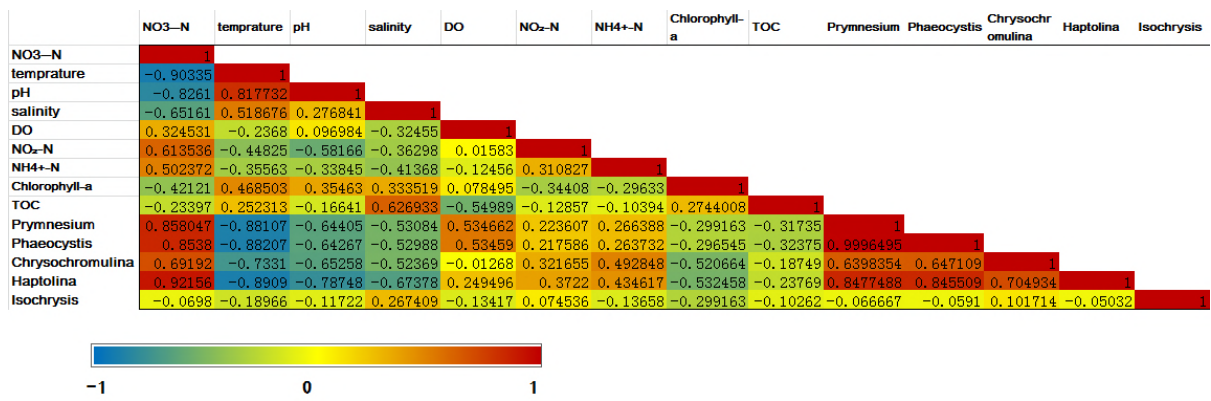

261

262 Figure 7. The correlation between the relative abundance of five kinds of Haptophyceae algae  
 263 and environmental factor (NO<sub>3</sub><sup>-</sup>-N, temprature, H, salinity, DO, NO<sub>2</sub><sup>-</sup>-N, NH<sub>4</sub><sup>+</sup>-N, Chlorophyll a  
 264 and TOC) was indicated by Correlation matrix (Pearson's product moment correlation  
 265 coefficient). The more the colure of shaded cells was close to red, the more significantly the  
 266 correlation was positively related (P < 0.05); inversely, the more the colure of shaded cells was  
 267 close to blue, the more significantly the correlation was negatively related (P < 0.05).

268

269 Chrysochromulina was the most abundant taxon of Haptophyceae algae in this study. The  
 270 environmental factors NO<sub>3</sub><sup>-</sup>-N, pH and seawater temperature on the relative abundance of  
 271 Chrysochromulina were studied by regression analysis. The concentration of NO<sub>3</sub><sup>-</sup>-N possessed  
 272 significant positive impact on the relative abundance of Chrysochromulina (Pearson r=0.692,  
 273 p<0.01; R<sup>2</sup>=0.479; Y=-0.001 + 0.281\*X, Y is the relative abundance of Chrysochromulina, X is the  
 274 concentration of NO<sub>3</sub><sup>-</sup>-N; F=12.859, P<0.05; regression coefficient is 0.281, P=0.003). Conversely,  
 275 the temperature of seawater indicated obvious negative influence on the relative abundance of  
 276 Chrysochromulina (Pearson r=-0.733, p<0.01; R<sup>2</sup>=0.537; Y=0.123-0.007\*X, Y is the relative  
 277 abundance of Chrysochromulina, X is the value of seawater temperature; F=16.266, P<0.05;  
 278 regression coefficient is -0.007, P=0.001), and pH showed the same features on it (Pearson  
 279 r=-0.653, p<0.01; R<sup>2</sup>=0.426; Y=0.282-0.032\*X, Y is the relative abundance of Chrysochromulina, X  
 280 is the value of seawater pH; F=10.384, P<0.05; regression coefficient is -0.032, P=0.006).

281 There is consistent relation between the relative abundance of Phaeocystis and  
 282 environmental factor NO<sub>3</sub><sup>-</sup>-N, DO, pH and temperature of sea water. The relative abundance of

283 Phaeocystis has obvious correlation with  $\text{NO}_3^-$ -N (Pearson  $r=0.856$ ,  $p<0.01$ ). Linear regression  
284 analysis indicated that Phaeocystis was significantly linearly related to the  $\text{NO}_3^-$ -N ( $R^2=0.732$ ;  
285  $Y=-0.005 + 0.410*X$ , Y is the relative abundance of *P.globosa*, X is the concentration of  $\text{NO}_3^-$ -N;  
286  $F=38.227$ ,  $P<0.05$ ) and  $\text{NO}_3^-$ -N has a significant positive effect on *P.globosa* (regression  
287 coefficient is 0.410,  $P=0.000$ ). The relative abundance of Phaeocystis had a positive correlation  
288 with DO (Pearson  $r=0.535$ ,  $p<0.01$ ;  $R^2=0.286$ ;  $Y=-0.140 + 0.016*DO$ ,  $F=5.616$ ,  $P<0.05$ ; regression  
289 coefficient is 0.016,  $P<0.05$ ). The relative abundance of Phaeocystis was significant related to  
290 temperature of sea water (Pearson  $r=-0.882$ ,  $p<0.01$ ). Water temperature can explain the 77.8%  
291 change reason for the *P.globosa* ( $R^2=0.778$ ), and has a significant effect on *P. globosa*  
292 ( $Y=0.169-0.009*X$ ,  $F=49.031$ ,  $P<0.05$ ), and the regression coefficient is -0.009 ( $P=0.000$ ) which  
293 indicated a significant negative impact relationship between them. The relative abundance of  
294 Phaeocystis also has negative correlation with pH of sea water (Pearson  $r=-0.643$ ,  $p<0.01$ ).

295 Prymnesium exhibited very similar condition with Phaeocystis, concerning relationship  
296 between their relative abundance and environmental characteristics. For example, the relative  
297 abundance of Prymnesium showed highly correlation with  $\text{NO}_3^-$ -N (Pearson  $r=0.858$ ,  $p<0.01$ )  
298 and  $\text{NO}_3^-$ -N had a significant positive impact on the relative abundance of Prymnesium  
299 ( $R^2=0.736$ ;  $Y=-0.000 + 0.002*X$ , Y is the relative abundance of Prymnesium, X is the concentration  
300 of  $\text{NO}_3^-$ -N;  $F=39.079$ ,  $P<0.05$ ; regression coefficient is 0.002,  $P=0.000$ ). In contrast, the  
301 temprature of seawater exhibited obvious negative effect on Prymnesium ( $R^2=0.776$ ;  $Y=0.001 -$   
302  $0.000*X$ , Y is the relative abundance of Prymnesium, X is the value of temperature of seawater;  
303  $F=48.579$ ,  $P<0.05$ ; regression coefficient is - 0.000,  $P=0.000$ ).

304

## 305 **Discussion**

### 306 **NGS: a promising approach to study the community of algae in marine environments**

307 *P.globosa* bloom occurred in winter from the year of 2014-2015 near the coast of Beibu Gulf  
308 annually. In order to discover the bloom mechanism, *P. globosa* was monitored between eastern  
309 Qinzhou Bay (EQB) and Dafenjiang River Estuary (DRE) during Nov 15<sup>th</sup> 2017 to Feb 15<sup>th</sup> 2018.



310 The beginning of the *P. globosa* bloom appeared from the middle several days of Jan in 2018,  
311 and disappearing occurred at the end of Mar in 2018. All the above findings were based on  
312 microscopy observations and cell counts, and it seems that the bloom appeared suddenly and  
313 instantly. We believed that finding out what happened before the emergence of *P. globosa*, not  
314 only by observations of microscopy and naked eyes, was very significant for our understanding of  
315 bloom mechanism of *P. globosa* in Beibu Gulf.

316 Classically, the algae ecological value is weighted based on the relative abundance of  
317 morphologically identified species. This traditional method is costly, time-consuming, and  
318 requires excellent taxonomic expertise, which is not always available [40]. Comparatively  
319 speaking, the eDNA and NGS approach for identification and quantification of algae open a new  
320 avenues for assessing and monitoring of aquatic ecosystems [41]. In our present work, by  
321 utilizing NGS based eDNA detection, not only the *P. globosa*, but also all the algae species  
322 belonging to Haptophyceae, taxonomically including *P. globosa*, were discovered and analyzed.  
323 The two most abundant OTUs in taxon Haptophyceae were affiliated with *Chrysochromulina*  
324 (5353 reads) and *Phaeocystis* (2298 reads), significantly more reads than *Haptolina* (228 reads),  
325 *Prymnesium* (9 reads) and *Isochrysis* (6 reads). The genus *Chrysochromulina* include two species  
326 *Chrysochromulina scutellum* and *Chrysochromulina* sp., both not very clear about their  
327 significance in ecosystem. But for the genus *Phaeocystis*, *P. globosa* was obviously detected  
328 among the samples, and this was in accord with our traditional monitoring approaches for the  
329 findings of *P.globosa* bloom in Beibu Gulf. Our result convincingly implicated that algae  
330 community reflected by eDNA and 18S ribosomal DNA analysis of the V4 region using the  
331 Illumina-Based Sequencing platform was suitable for monitoring the harmful algae in the early  
332 bloom stage. Many scientist had utilized HTS or NGS to detect algae in aquatic ecosystems and  
333 got some attractive results; for instance, NGS had been employed to microalgal diversity in the  
334 lichen *Ramalina farinacea* [42], Diatom resting stages in surface sediments [43], Diatom  
335 biomonitoring [40] and detection of harmful algal bloom species [44]. All the results show that  
336 eDNA and HTS sequencing is a promising approach to explore the community of algae in aquatic  
337 environments [45].

338 **Hypothesis about the bloom mechanism of *P.globosa* in Beibu Gulf**

339 Some mechanisms about the bloom of *P. globosa* could be proposed from our present work.

340 The first and most interesting finding was the bloom mode of *P. globosa*. In this study, at the  
341 early bloom stage, *P. globosa* was only obviously detected at site S8 with relatively much higher  
342 reads (2150) than other sixteen sites (148 in all). Therefore, the bloom of *P. globosa* may  
343 originate from a point of site (S8) and then spread to other regions, generally speaking, just as  
344 “diffusion from point to face”. Several evidences supported our opinion. Firstly, the marine  
345 environment in the Beibu Gulf was protected relatively better than other coastal zones in China  
346 [46]. Large area pollution, especially excessive nutrient concentration, had never appeared and  
347 been reported previously. Inversely, the probability of point source pollution in the coastal zone  
348 was even greater. The first appearance and flourish of *P. globosa* only at site S8 was probably  
349 because of its special condition, such as aquaculture farming nearby and consequent  
350 eutrophication phenomenon, rich nutrients brought by bottom-up stream and terrestrial  
351 drainage. Then the Phaeocystis was carried by transport of some water and drifted along the  
352 coastline under the influence of stream in Beibu Gulf. Some previous research could support our  
353 opinion. For instance, during the Phaeocystis bloom of the year 1957 around the coast of North  
354 Wales, Phaeocystis was only able to proliferate in Liverpool Bay, and then spread to other regions  
355 [47]; when Phaeocystis bloom in the coastal of north-western English Channel in 1990,  
356 Phaeocystis bloom emanated from near-shore, then spread towards the south-east in accord  
357 with the wind direction [48]. If our hypothesis is correct, releasing effective bio-agents and  
358 environmental controls on certain region to inhibit harmful algal blooms (HABs) *P. globosa* will  
359 be promising [49-51]. In this way, we only need to paid more attention to the early stage of *P.*  
360 *globosa* bloom, not after outbreaks in large scale, and this should be extremely effective.

361 The second interesting finding about the bloom of *P. globosa* was in relevant to the  
362 concentration of  $\text{NO}_3^-$ -N, pH, temperature and DO of seawater. More specifically, the bloom of *P.*  
363 *globosa* has a significant positive correlation with  $\text{NO}_3^-$ -N and negatively related to temperature  
364 of seawater. In the Beibu Gulf, the average temperature of seawater was above 15-16 °C and  
365 the most suitable temperature for growth of *P. globosa* is 15-16 °C [52], so the most relative  
366 abundance of *P. globosa* appeared first at site S8 may originate from its appropriate temperature  
367 of seawater. Nutrient elements, especially nitrogen and phosphorus, have obvious influence on



368 Phaeocystis blooms [52,53]. However, the impact of different forms of N-sources to the bloom of  
369 Phaeocystis had never been discovered previously. In our present work, it was the first time that  
370 the great correlation between  $\text{NO}_3^-$ -N and Phaeocystis bloom was illustrated. This result provided  
371 a helpful reference to our government on how to manage marine environment and control the  
372 *P.globosa* bloom. They should pay more attention to reduce the emission of nitrogen, especially  
373  $\text{NO}_3^-$ -N, to the coastal zone of northern Beibu Gulf.

374

### 375 **Acknowledgments**

376 Supported by the National Natural Science Foundation of China (31570875); Guangxi Natural  
377 Science Foundation (2014GXNSFBA118135); Foundation of Guangxi Key Laboratory of Marine  
378 Disaster in the Beibu Gulf, Qinzhou University (No.2017TS03); Foundation of  
379 the Key Laboratory of Coastal Science and Engineering, Beibu Gulf, Guangxi (No.2016ZYB07).

380

### 381 **Author Contributions**

382 **Conceptualization:** Bin Gong

383 **Funding acquisition:** Bin Gong, Haiping Wu

384 **Formal analysis:** Bin Gong

385 **Project administration:** Bin Gong, Haiping Wu

386 **Supervision:** Haiping Wu

387 **Validation:** Jixian Ma, Meimiao Luo, Xin Li

388 **Writing-original draft:** Bin Gong

389 **Writing-review & editing:** Haiping Wu

390

391 **Reference:**

- 392 1. Roelke D L, Gable G M, Valenti T W, Grover J P, Brooks BW, Pinckney J L. Hydraulic flushing  
393 as  
394 a *Prymnesium parvum* bloom-terminating mechanism in a subtropical lake.[J]. Harmful  
395 Algae, 2010, 9(3):323-332.
- 396 2. Dahl E, Lindahl O, Paasche E, Thronsen J. The *Chrysochromulina polylepis* Bloom in  
397 Scandinavian Waters During Spring 1988[J]. 1989, 35:383-405.
- 398 3. Jiang T, Jiang T J, Zeng M, Peng L, Tong M M. Toxicity of red tide alga *Phaeocystis globosa*  
399 scherffel from Zhanjiang against young *Penaeus vannamei* boone and fish fry[J]. Journal of  
400 Tropical & Subtropical Botany, 2006, 14.
- 401 4. Peperzak L, Poelman M. Mass mussel mortality in The Netherlands after a bloom of  
402 *Phaeocystis globosa* (prymnesiophyceae)[J]. Journal of Sea Research, 2008, 60(3):220-222.
- 403 5. Shen P P, Qi Y Z, Wang Y, Huang L M. *Phaeocystis globosa* Scherffel, a harmful microalga, and  
404 its production of dimethylsulfoniopropionate[J]. Chinese Journal of Oceanology and  
405 Limnology, 2011, 29(4):869-873.
- 406 6. Yu R C, Lü S H, Liang Y B. Harmful algal blooms in the coastal waters of China[J]. Global  
407 Ecology and Oceanography of Harmful Algal Blooms, 2018: 309-316.
- 408 7. Wu H , Xu Y , Peng C , Liao Y, Wang X, & Jefferson T A. Long-term habitat loss in a  
409 lightly-disturbed population of the Indo-Pacific humpback dolphin, *Sousa chinensis*[J].  
410 Aquatic Conservation Marine & Freshwater Ecosystems, 2017, 27(Supplement 1):1-11.
- 411 8. Liao Y, Hsieh H L, Xu S, Zhong Q, Lei J, Liang M. Wisdom of Crowds reveals decline of Asian  
412 horseshoe crabs in Beibu Gulf, China[J]. Oryx, 2017: 1-8.

- 413 9. Lai J, Jiang F, Ke K, Xu M, Lei F, Chen B. Nutrients distribution and trophic status assessment  
414 in the northern Beibu Gulf, China[J]. Chinese journal of oceanology and limnology, 2014,  
415 32(5): 1128-1144.
- 416 10. Wang Y J, Liao R Q, Liu W L, Kannan K, Ohura T, Wu M H. Chlorinated polycyclic aromatic  
417 hydrocarbons in surface sediment from Maowei Sea, Guangxi, China: occurrence,  
418 distribution, and source apportionment.[J]. Environmental Science & Pollution Research,  
419 2017, 24(1):1-12.
- 420 11. Han Q Y, Huang X P, Xing Q G, Shi P. A review of environment problems in the coastal sea of  
421 South China[J]. Aquatic Ecosystem Health & Management, 2012, 15(2):108-117.
- 422 12. Yang B, Kang Z J, Lu D L, Dan S F, Ning Z M, Lan W L, Zhong Q P. Spatial Variations in the  
423 Abundance and Chemical Speciation of Phosphorus across the River-Sea Interface in the  
424 Northern Beibu Gulf[J]. Water, 2018, 10(8): 1103.
- 425 13. Rouen M A, George D G, Hewitt D P. Using an automatic monitoring station to assess the  
426 impact of episodic mixing on the seasonal succession of phytoplankton[J]. Internationale  
427 Vereinigung für theoretische und angewandte Limnologie: Verhandlungen, 2000, 27(5):  
428 2972-2976.
- 429 14. Kutser T, Metsamaa L, Strömbeck N, Vahtmäe E. Monitoring cyanobacterial blooms by  
430 satellite remote sensing[J]. Estuarine Coastal & Shelf Science, 2006, 67(1):303-312.
- 431 15. Antonella P, Luca G. The quantitative real-time PCR applications in the monitoring of  
432 marine  
433 harmful algal bloom (HAB) species[J]. Environmental Science & Pollution Research  
434 International, 2013, 20(10):6851-6862.
- 435 16. Mackenzie L A. In situ passive solid-phase adsorption of micro-algal biotoxins as a monitoring

- 436 tool.[J]. *Curr Opin Biotechnol*, 2010, 21(3):326-331.
- 437 17. Pang S J, Liu F, Shan T F, Xu N, Zhang Z H, Gao S Q. Tracking the algal origin of the bloom in  
438 the Yellow Sea by a combination of molecular, morphological and physiological analyses[J].  
439 *Marine Environmental Research*, 2010, 69(4):207-215.
- 440 18. Creer S, Deiner K, Frey S, Porazinska D, Taberlet P, Thomas W K, Potter C, Bik H M. The  
441 ecologist's field guide to sequence-based identification of biodiversity[J]. *Methods in*  
442 *Ecology and Evolution*, 2016, 7(9): 1008-1018.
- 443 19. Elbrecht V, Peinert B, Leese F. Sorting things out: Assessing effects of unequal specimen  
444 biomass on DNA metabarcoding.[J]. *Ecology & Evolution*, 2017, 7(17):6918-6926.
- 445 20. Lanzén A, Lekang K, Jonassen I, Thompson E M, Troedsson C. High-throughput  
446 metabarcoding of eukaryotic diversity for environmental monitoring of offshore oil drilling  
447 activities[J]. *Molecular Ecology*, 2016, 25(17):4392-4406.
- 448 21. Divu D. Microsatellite DNA marker based molecular ecological evaluation studies in  
449 *Macrobrachium* species[D]. Karnataka Veterinary, Animal and Fisheries Sciences University,  
450 Bidar, 2009.
- 451 22. Cuvelier M L, Allen A E, Monier A, Mccrow J P, Monique M, Tringe S G. Targeted  
452 metagenomics and ecology of globally important uncultured eukaryotic phytoplankton[J].  
453 *Proceedings of the National Academy of Sciences*, 2010, 107(33): 14679-14684.
- 454 23. Steele H L, Streit W R. Metagenomics: advances in ecology and biotechnology[J]. *FEMS*  
455 *microbiology letters*, 2005, 247(2): 105-111.
- 456 24. Połka J, Rebecchi A, Pisacane V, Morelli L, Puglisi E. Bacterial diversity in typical Italian salami  
457 at different ripening stages as revealed by high-throughput sequencing of 16S rRNA

- 458 amplicons[J]. *Food Microbiology*, 2015, 46: 342-356.
- 459 25. Tedersoo L, Anslan S, Bahram M, Põlme S, Riit T, Liiv I, Kõljalg U, Kisand V, Nilsson H,  
460 Hildebrand F, Bork P, Abarenkov K. Shotgun metagenomes and multiple primer  
461 pair-barcode combinations of amplicons reveal biases in metabarcoding analyses of fungi[J].  
462 *MycoKeys*, 2015 (10): 1-43.
- 463 26. Mortazavi R, Attiya S, Ariya P A. Arctic microbial and next-generation sequencing approach  
464 for bacteria in snow and frost flowers: selected identification, abundance and freezing  
465 nucleation[J]. *Atmospheric Chemistry and Physics*, 2015, 15(11): 6183-6204.
- 466 27. Kristiansen H B. Characterization of marine fungal communities using next generation  
467 sequencing techniques[D]. 2014.
- 468 28. Medlin L K, Orozco J. Molecular techniques for the detection of organisms in aquatic  
469 environments, with emphasis on harmful algal bloom species[J]. *Sensors*, 2017, 17(5): 1184.
- 470 29. Rees H C, Maddison B C, Middleditch D J, Patmore J R M, Gough K C, Crispo E. REVIEW: The  
471 detection of aquatic animal species using environmental DNA-a review of eDNA as a survey  
472 tool in ecology[J]. *Journal of Applied Ecology*, 2015, 51(5):1450-1459.
- 473 30. Elwood H J, Olsen G J, Sogin M L. The small-subunit ribosomal RNA gene sequences from the  
474 hypotrichous ciliates *Oxytricha nova* and *Stylonychia pustulata*[J]. *Molecular biology and*  
475 *evolution*, 1985, 2(5): 399-410.
- 476 31. Cheung, M. K., Au, C. H., Chu, K. H., Kwan, H. S. Wong, C. K. Composition and genetic  
477 diversity of picoeukaryotes in subtropical coastal waters as revealed by 454 pyrosequencing.  
478 *ISME J.* 4, 1053-1059 (2010).
- 479 32. Magoč T, Salzberg S L. FLASH: fast length adjustment of short reads to improve genome

- 480 assemblies[J]. *Bioinformatics*, 2011, 27(21): 2957-2963.
- 481 33. Caporaso J G, Kuczynski J, Stombaugh J, Bittinger K, Bushman F D, Costello E K, Fierer N, Peña  
482 A G, Goodrich J K, Gordon J I, Huttley G A, Kelley S T, Knights D, Koenig J E, Ley R E, Lozupone  
483 C A, McDonald D, Muegge B D, Pirrung M, Reeder J, Sevinsky J R, Turnbaugh P J, Walters W  
484 A, Widmann J, Yatsunencko T, Zaneveld J, Knight R. QIIME allows analysis of high-throughput  
485 community sequencing data[J]. *Nature methods*, 2010, 7(5): 335.
- 486 34. Edgar R C. UPARSE: highly accurate OTU sequences from microbial amplicon reads[J]. *Nature*  
487 *methods*, 2013, 10(10): 996.
- 488 35. DeSantis T Z, Hugenholtz P, Larsen N, Rojas M, Brodie E L, Keller K, Huber T, Dalevi D, Hu P,  
489 Andersen G L. Greengenes, a chimera-checked 16S rRNA gene database and workbench  
490 compatible with ARB[J]. *Applied and environmental microbiology*, 2006, 72(7): 5069-5072.
- 491 36. Strickland J D H, Parsons T R. A practical handbook of seawater analysis[J]. 1972.
- 492 37. Aminot A, K erouel R. Dissolved organic carbon, nitrogen and phosphorus in the NE Atlantic  
493 and the NW Mediterranean with particular reference to non-refractory fractions and  
494 degradation[J]. *Deep Sea Research Part I: Oceanographic Research Papers*, 2004, 51(12):  
495 1975-1999.
- 496 38. Ali U, Mahmood A, Syed J H, Li J, Zhang G, Katsoyiannis A, Jones K C, Malik R N. Assessing the  
497 combined influence of TOC and black carbon in soil-air partitioning of PBDEs and DPs from  
498 the Indus River Basin, Pakistan[J]. *Environmental pollution*, 2015, 201: 131-140.
- 499 39. Elbasiouny H, Abowaly M, Abu\_Alkehr A, Gad A. Spatial variation of soil carbon and nitrogen  
500 pools by using ordinary Kriging method in an area of north Nile Delta, Egypt[J]. *Catena*,  
501 2014, 113: 70-78.
- 502 40. Vasselon V, Domaizon I, Rimet F, Kahlert M, Agn s B. Application of high-throughput

503 sequencing (HTS) metabarcoding to diatom biomonitoring: Do DNA extraction methods  
504 matter?[J]. *Freshwater Science*, 2017, 36(1):162-177.

505 41. Visco JA, Apothéloz-Perret-Gentil L, Cordonier A, Esling P, Pillet L, Pawlowski J.

506 Environmental Monitoring: Inferring the Diatom Index from Next-Generation Sequencing  
507 Data[J]. *Environmental Science & Technology*, 2015, 49(13):7597-605.

508 42. Moya P, Molins A, Martínez-Alberola F, Muggia L, Barreno E. Unexpected associated  
509 microalgal diversity in the lichen *Ramalina farinacea* is uncovered by pyrosequencing  
510 analyses[J]. *Plos One*, 2017, 12(4):e0175091.

511 43. Piredda R, Sarno D, Lange C B, Tomasino M P, Zingone A, Montresor M. Diatom Resting  
512 Stages in Surface Sediments: A Pilot Study Comparing Next Generation Sequencing and  
513 Serial Dilution Cultures[J]. *Cryptogamie Algologie*, 2013, 38(1):31-46.

514 44. Linda K. Medlin, Jahir Orozco. Molecular Techniques for the Detection of Organisms in  
515 Aquatic Environments, with Emphasis on Harmful Algal Bloom Species[J]. *Sensors (Basel,*  
516 *Switzerland)*, 2017, 17(5):1184.

517 45. Oliveira M C, Repetti S I, Iha C, Jackson C J, Pilar D T, Valéria C. High-throughput sequencing  
518 for algal systematics[J]. *European Journal of Phycology*, 2018, 53(3):1-17.

519 46. Li J, Gao J, Wang Y, Feng X L, Fang X S, Cao P, Sun X Q, Ye W X, Khokiattiwong S,  
520 Kornkanitnan N. Distribution and dispersal pattern of clay minerals in surface sediments,  
521 eastern Beibu Gulf, South China Sea[J]. *Acta Oceanologica Sinica*, 2012, 31(2): 78-87.

522 47. Jones P G W, Haq S M. The distribution of *Phaeocystis* in the eastern Irish Sea[J]. *ICES Journal*  
523 *of Marine Science*, 1963, 28(1): 8-20.

524 48. Davies A G, De Madariaga I, Bautista B, Fernández E, Tranter P R G. The ecology of a coastal

- 525           Phaeocystis bloom in the north-western English Channel in 1990[J]. Journal of the Marine  
526           Biological Association of the United Kingdom, 1992, 72(3): 691-708.
- 527   49. Brussaard C P D. Viral Control of Phytoplankton Populations-a Review 1[J]. Journal of  
528           Eukaryotic Microbiology, 2004, 51(2): 125-138.
- 529   50. Weston K, Greenwood N, Fernand L, Pearce D J, Sivyer D B. Environmental controls on  
530           phytoplankton community composition in the Thames plume, U.K.[J]. Journal of Sea  
531           Research, 2008, 60(4):246-254.
- 532   51. Guan C, Guo X, Cai G, Zhang H J, Li Y, Zheng W, Zheng T L. Novel algicidal evidence of a  
533           bacterium *Bacillus* sp. LP-10 killing *Phaeocystis globosa*, a harmful algal bloom causing  
534           species[J]. Biological Control, 2014, 76(3):79-86.
- 535   52. Schoemann V, Becquevort S, Stefels J, Lancelot C. Phaeocystis, blooms in the global ocean  
536           and their controlling mechanisms: a review [J]. Journal of Sea Research, 2005, 53(1):43-66.
- 537   53. Riegman R. Nutrient-related selection mechanisms in marine phytoplankton communities  
538           and the impact of eutrophication on the planktonic food web[J]. Wat.sci.technol, 1995,  
539           32(4):63-75.
- 540
- 541
- 542
- 543
- 544
